# Supplementary material for: The autoinducer synthases LuxI and AinS are responsible for temperature-dependent AHL production in the fish pathogen Aliivibrio salmonicida
Source: PubMed Central journal article supplement (PMC4377199; doi:10.1186/s12866-015-0402-z), 2015-03-24
Supplement: 12866_2015_402_MOESM1_ESM.pdf [file 12866_2015_402_MOESM1_ESM.pdf]

**Table S1** Primers used in this study<sup>a</sup>

| <b>Primer name</b>                                                          | <b>Primer sequences (5' - 3')</b>                        | <b>Source or reference</b> |
|-----------------------------------------------------------------------------|----------------------------------------------------------|----------------------------|
| <i>Primers used for construction of overlap PCR products</i>                |                                                          |                            |
| AinS-A                                                                      | AAT <b>CTCGAGA</b> AATCACTCTATCCCTCAATCAC                | This study                 |
| AinS-B                                                                      | TTTATAAGTGACTAATTT <b>CAGTTAGAGA</b> ATCGAAAGTT          | This study                 |
| AinS-C                                                                      | TTAGTCACTTATAAAGGTATTTGCT                                | This study                 |
| AinS-D                                                                      | GG <b>ACTAGT</b> ATTTTAGGATCAACTTTCATC                   | This study                 |
| <i>Primers used for amplification of internal gene fragments</i>            |                                                          |                            |
| LuxI-F                                                                      | <b>CTCGAG</b> ATCCGAGTTTACTACTATTCCT                     | This study                 |
| LuxI-R                                                                      | <b>ACTAGT</b> ATCACCAAGTAATTCAGGGA                       | This study                 |
| LuxR1-F                                                                     | <b>CCCGGATCC</b> ACTCACCTATTCCTTTGGGACA                  | This study                 |
| LuxR1-R                                                                     | <b>CCCGGATCCG</b> AAAAGAGACAGTCAGTAGAT                   | This study                 |
| LuxR2-F                                                                     | <b>CCCGGATCCC</b> ATCACTCCCCTATTAATTG                    | This study                 |
| LuxR2-R                                                                     | <b>CCCGGATCCT</b> GTGTACCTGTTGATCTTCT                    | This study                 |
| <i>Primers used for verification of plasmids and A. salmonicida mutants</i> |                                                          |                            |
| AinS-E                                                                      | CCAGCTCGTGCTAATACTTT                                     | This study                 |
| AinS-F                                                                      | GGCAACTCGTTCACTAAAAT                                     | This study                 |
| LuxR1-F2                                                                    | AACCGTCAGATAAAGAGAAACG                                   | This study                 |
| LuxR2-F2                                                                    | AACACCGCTGTACCGTCAAG                                     | This study                 |
| LuxI-F2                                                                     | AAAAAGCAGGCTTCGAAGGAGATAGAACCATGACAATAATGATAAGAAAATCCGAG | This study                 |
| LuxI-R2                                                                     | AGAAAGCTGGGTCTTATATTAATACAGCCTTTTAAATTG                  | This study                 |
| PNQ-F                                                                       | TAACGGCAAAAAGCACCGCCGGACATCA                             | Milton et al., 1996        |
| PNQ-R                                                                       | TGTACACCTTAACACTCGCCTATTGTT                              | Milton et al., 1996        |
| M13-F                                                                       | GCCAGGGTTTTCCAGTCACGA                                    | Invitrogen                 |
| M13-R                                                                       | GAGCGGATAACAATTCACACAGG                                  | Invitrogen                 |

<sup>a</sup> Nucleotides in bold font are *SpeI* (a/ctagt), *XhoI* (c/tcgag) or *BamHI* (g/gatcc) restriction sites added to the 5' region of the primer
