# Supplementary material for: The autoinducer synthases LuxI and AinS are responsible for temperature-dependent AHL production in the fish pathogen Aliivibrio salmonicida
Source: PubMed Central journal article supplement (PMC4377199; doi:10.1186/s12866-015-0402-z), 2015-03-24
Supplement: 12866_2015_402_MOESM2_ESM.pdf [file 12866_2015_402_MOESM2_ESM.pdf]

**Table S2** AHL detection and quantification parameters for the HPLC Full Scan HR-MS method

| <b>AHL<sup>a</sup></b> | <b>Parent ion<sup>b</sup></b><br><b>[M + H]<sup>+</sup></b><br><b>(m/z)</b> | <b>Molecular</b><br><b>Formula</b>              | <b>RT<sup>c</sup></b><br><b>(min)</b> | <b>LOD<sup>d</sup></b><br><b>(nM)</b> | <b>LOQ<sup>e</sup></b><br><b>(nM)</b> |
|------------------------|-----------------------------------------------------------------------------|-------------------------------------------------|---------------------------------------|---------------------------------------|---------------------------------------|
| <b>C6-HSL</b>          | 216.12303                                                                   | C <sub>10</sub> H <sub>17</sub> NO <sub>4</sub> | 4.43                                  | 0.92                                  | 3.06                                  |
| <b>3-oxo-C6-HSL</b>    | 214.10738                                                                   | C <sub>10</sub> H <sub>15</sub> NO <sub>4</sub> | 3.02                                  | 9.85                                  | 32.80                                 |
| <b>3-OH-C6-HSL</b>     | 200.12812                                                                   | C <sub>10</sub> H <sub>17</sub> NO <sub>3</sub> | 2.94                                  | 5.70                                  | 18.99                                 |
| <b>C8-HSL</b>          | 242.13868                                                                   | C <sub>12</sub> H <sub>19</sub> NO <sub>4</sub> | 5.77                                  | 0.54                                  | 1.81                                  |
| <b>3-oxo-C8-HSL</b>    | 244.15433                                                                   | C <sub>12</sub> H <sub>21</sub> NO <sub>4</sub> | 4.91                                  | 0.89                                  | 2.96                                  |
| <b>3-OH-C8-HSL</b>     | 228.15942                                                                   | C <sub>12</sub> H <sub>21</sub> NO <sub>3</sub> | 4.68                                  | 1.59                                  | 5.30                                  |
| <b>C10-HSL</b>         | 270.16998                                                                   | C <sub>14</sub> H <sub>23</sub> NO <sub>4</sub> | 6.86                                  | 0.48                                  | 1.58                                  |
| <b>3-oxo-C10-HSL</b>   | 272.18563                                                                   | C <sub>14</sub> H <sub>25</sub> NO <sub>4</sub> | 6.10                                  | 0.76                                  | 2.54                                  |
| <b>3-OH-C10-HSL</b>    | 256.19072                                                                   | C <sub>14</sub> H <sub>25</sub> NO <sub>3</sub> | 5.82                                  | 0.47                                  | 1.57                                  |
| <b>C12-HSL</b>         | 300.21693                                                                   | C <sub>16</sub> H <sub>29</sub> NO <sub>4</sub> | 7.74                                  | 0.45                                  | 1.51                                  |
| <b>3-oxo-C12-HSL</b>   | 298.20128                                                                   | C <sub>16</sub> H <sub>27</sub> NO <sub>4</sub> | 6.98                                  | 0.39                                  | 1.30                                  |
| <b>3-OH-C12-HSL</b>    | 284.22202                                                                   | C <sub>16</sub> H <sub>29</sub> NO <sub>3</sub> | 6.72                                  | 0.40                                  | 1.35                                  |

<sup>a</sup> AHL, Acyl homoserine lactones

<sup>b</sup> Monoisotopic mass values calculated using the Xcalibur software version 2.07 (Thermo Scientific)

<sup>c</sup> RT, Retention time, units in minutes

<sup>d</sup> LOD, Limit of detection is defined as the lowest concentration (nM) that can be detected with signal to noise ratio above 3:1

<sup>e</sup> LOQ, Limit of quantification is the concentration equal a signal to noise ratio of 10:1
